# Supplementary material
Source: HighWire-hosted journal article supplement (https://bmjopen.bmj.com/content/11/9/e051028)
Supplement: inline-supplementary-material-6 [file inline-supplementary-material-6.pdf]

**Supplementary Table 3: Average relative sizes of cerebral arteries and anatomical locations of cerebral****aneurysms in the current** Cerebral Computed Tomography Angiography scans studies (total cases, n = 145,

age range = 18 to 100 years, female = 79, male = 67). Total 113 aneurysms were recorded in 83 patients. VBA =

vertebra basilar arteries; ACA = anterior cerebral artery, AcomAC = anterior communicating artery complex;

A1 = first segment of ACA; P2 of PCA = second part of PCA; ICA = internal carotid arterial; A2 of ACA =

second part of ACA, and M1 of MCA= first part of MCA.

|                      | Aneurysms              |      | Average relative artery size<br>(internal diameter) |      | Average artery size in mm<br>(internal diameter) |      |
|----------------------|------------------------|------|-----------------------------------------------------|------|--------------------------------------------------|------|
|                      | Right                  | Left | Right                                               | Left | Right                                            | Left |
| <b>A1 of ACA</b>     | 27 aneurysms in AcomAC |      | 0.87                                                | 0.95 | 2.36                                             | 2.47 |
| <b>ICA</b>           | 14                     | 8    | 1.57                                                | 1.55 | 3.9                                              | 3.86 |
| <b>M1 of MCA</b>     | 32                     | 24   | 1.12                                                | 1.11 | 2.78                                             | 2.76 |
| <b>P2 of PCA</b>     | 0                      | 0    | 0.95                                                | 0.95 | 2.36                                             | 2.36 |
| <b>A2 of ACA</b>     | 0                      | 0    | 0.96                                                | 0.95 | 2.39                                             | 2.36 |
| <b>VBA aneurysms</b> |                        | 8    |                                                     |      |                                                  |      |
