# Supplementary material
Source: HighWire-hosted journal article supplement (https://bmjopen.bmj.com/content/11/9/e051028)
Supplement: inline-supplementary-material-7 [file inline-supplementary-material-7.pdf]

[illegible]
